# Supplementary material for: Molecular Structure, In Vitro Anticancer Study and Molecular Docking of New Phosphate Derivatives of Betulin
Source: PubMed Central journal article supplement (PMC7866984; doi:10.3390/molecules26030737), 2021-01-31
Supplement: molecules-26-00737-s001.pdf [file molecules-26-00737-s001.pdf]

## Supplementary materials

### **Molecular structure, *in vitro* anticancer study and molecular docking of new phosphate derivatives of betulin**

*Elwira Chrobak*<sup>\*1</sup>, *Maria Jastrzębska*<sup>2</sup>, *Ewa Bębenek*<sup>1</sup>, *Monika Kadela-Tomanek*<sup>1</sup>, *Krzysztof Marciniec*<sup>1</sup>, *Małgorzata Latocha*<sup>3</sup>, *Roman Wrzalik*<sup>2</sup>, *Joachim Kusz*<sup>4</sup>, *Stanisław Boryczka*<sup>1</sup>

Department of Organic Chemistry, Faculty of Pharmaceutical Sciences in Sosnowiec, Medical University of Silesia, Katowice, 4 Jagiellońska Str., 41-200 Sosnowiec, Poland

<sup>2</sup> Silesian Center for Education and Interdisciplinary Research, University of Silesia, Institute of Physics, 75 Pułku Piechoty 1a, 41-500 Chorzów, Poland

<sup>3</sup> Department of Cell Biology, Faculty of Pharmaceutical Sciences in Sosnowiec, Medical University of Silesia, Katowice, 8 Jedności Str., 41-200 Sosnowiec, Poland

<sup>4</sup> University of Silesia, Institute of Physics, 75 Pułku Piechoty Str., 41 500 Chorzów, Poland

\*Corresponding author.

E-mail address: echrobak@sum.edu.pl

## LIST OF CONTENTS

|                                                                                                                                                           |           |
|-----------------------------------------------------------------------------------------------------------------------------------------------------------|-----------|
| <b>Synthesis - <i>Materials and methods</i></b> .....                                                                                                     | <b>3</b>  |
| <b>Nuclear Magnetic Resonance spectra for selected compounds</b>                                                                                          |           |
| <b>Fig. S1a.</b> <sup>1</sup> H NMR, 3,28-diacetoxy-30-diethoxyphosphoryloxybetulin <b>4</b> .....                                                        | <b>4</b>  |
| <b>Fig. S1b.</b> <sup>13</sup> C NMR, 3,28-diacetoxy-30-diethoxyphosphoryloxybetulin <b>4</b> .....                                                       | <b>4</b>  |
| <b>Fig. S1c.</b> <sup>31</sup> P NMR, 3,28-diacetoxy-30-diethoxyphosphoryloxybetulin <b>4</b> .....                                                       | <b>5</b>  |
| <b>Fig. S1d.</b> HR-MS, 3,28-diacetoxy-30-diethoxyphosphoryloxybetulin <b>4</b> .....                                                                     | <b>5</b>  |
| <b>Fig. S2a.</b> <sup>1</sup> H NMR, 30-diethoxyphosphoryloxybetulin <b>5</b> .....                                                                       | <b>6</b>  |
| <b>Fig. S2b.</b> <sup>13</sup> C NMR, 30-diethoxyphosphoryloxybetulin <b>5</b> .....                                                                      | <b>6</b>  |
| <b>Fig. S2c.</b> <sup>31</sup> P NMR, 30-diethoxyphosphoryloxybetulin <b>5</b> .....                                                                      | <b>7</b>  |
| <b>Fig. S2d.</b> HR-MS, 30-diethoxyphosphoryloxybetulin <b>5</b> .....                                                                                    | <b>7</b>  |
| <b>Fig. S3a.</b> <sup>1</sup> H NMR, 30-diethoxyphosphoryloxy-28-propynoylbetulin <b>7a</b> .....                                                         | <b>8</b>  |
| <b>Fig. S3b.</b> <sup>13</sup> C NMR, 30-diethoxyphosphoryloxy-28-propynoylbetulin <b>7a</b> .....                                                        | <b>8</b>  |
| <b>Fig. S3c.</b> <sup>31</sup> P NMR, 30-diethoxyphosphoryloxy-28-propynoylbetulin <b>7a</b> .....                                                        | <b>9</b>  |
| <b>Fig. S3d.</b> HR-MS, 30-diethoxyphosphoryloxy-28-propynoylbetulin <b>7a</b> .....                                                                      | <b>9</b>  |
| <b>Fig. S4a.</b> <sup>1</sup> H NMR, 28-(2-butynoyl)-30-diethoxyphosphoryloxybetulin <b>7b</b> .....                                                      | <b>10</b> |
| <b>Fig. S4b.</b> <sup>13</sup> C NMR, 28-(2-butynoyl)-30-diethoxyphosphoryloxybetulin <b>7b</b> .....                                                     | <b>10</b> |
| <b>Fig. S4c.</b> <sup>31</sup> P NMR, 28-(2-butynoyl)-30-diethoxyphosphoryloxybetulin <b>7b</b> .....                                                     | <b>11</b> |
| <b>Fig. S4d.</b> HR-MS, 28-(2-butynoyl)-30-diethoxyphosphoryloxybetulin <b>7b</b> .....                                                                   | <b>11</b> |
| <b>Fig. S5a.</b> <sup>1</sup> H NMR, 28-(2-cyclopropylpropynoyl)-30-diethoxyphosphoryloxybetulin <b>7c</b> ..                                             | <b>12</b> |
| <b>Fig. S5b.</b> <sup>13</sup> C NMR, 28-(2-cyclopropylpropynoyl)-30-diethoxyphosphoryloxybetulin <b>7c</b> .                                             | <b>12</b> |
| <b>Fig. S5c.</b> <sup>31</sup> P NMR, 28-(2-cyclopropylpropynoyl)-30-diethoxyphosphoryloxybetulin <b>7c</b> ..                                            | <b>13</b> |
| <b>Fig. S5d.</b> HR-MS, 28-(2-cyclopropylpropynoyl)-30-diethoxyphosphoryloxybetulin <b>7c</b> ...                                                         | <b>13</b> |
| <b>Table S1.</b> Calculated Raman band frequencies and assignments for compounds <b>10</b> and <b>5</b> .                                                 | <b>14</b> |
| <b>X-ray diffraction experiment</b> .....                                                                                                                 | <b>15</b> |
| <b>Table S2</b> Crystal parameters, data collection and refinement details for compound <b>5</b> .....                                                    | <b>16</b> |
| <b>Table S3</b> Monocrystal characteristic.....                                                                                                           | <b>16</b> |
| <b>Table S4</b> Selected hydrogen bonds in the crystal structure of compound <b>5</b> .....                                                               | <b>17</b> |
| <b>Chromatographic procedure by RP-TLC</b> .....                                                                                                          | <b>17</b> |
| <b>Table S5.</b> The theoretical values of lipophilicity for tested compounds <b>3-5</b> , <b>6a-6e</b> and <b>7a-7e</b> .....                            | <b>18</b> |
| <b>Table S6.</b> The correlation matrix for theoretically obtained lipophilicity parameters of compounds <b>3-5</b> , <b>6a-6e</b> and <b>7a-7e</b> ..... | <b>18</b> |

## **Synthesis - *Materials and methods***

In the synthesis, commercially available reagents were used (Sigma-Aldrich, Saint Louis, MO, USA). The solvents were purified according to the standard methods. The NMR spectra ( $^1\text{H}$ , 600 MHz;  $^{13}\text{C}$ , 150 MHz;  $^{31}\text{P}$ , 243 MHz) were recorded on a Bruker AVANCE III HD 600 spectrometer in deuterated chloroform ( $\text{CDCl}_3$ ). Chemical shifts ( $\delta$ ) values were reported in parts per million (ppm) relative to the solvent signal as internal standard. The coupling constants ( $J$ ) are expressed in Hertz (Hz). Calculation of the exact molecular mass for new compounds was performed using “The Exact Mass Calculator, Single Isotope Version” (<http://www.sisweb.com/referenc/tools/exactmass.htm>). High-resolution mass (HR-MS) spectra were recorded with Bruker Impact II. Melting points were uncorrected and measured by Electrothermal IA 9300 melting point apparatus. The progress of reaction was monitored by TLC (silica gel 60 254F plates, Merck). A mixture of dichloromethane/ethanol (40:1 or 15:1, v/v) or hexane/ethyl acetate (3:2, v/v) was used as a developing system. The spots were visualized by spraying with a solution of 5% sulfuric acid and heating to 100°C. The compounds were purified by column chromatography (silica gel 60, <63  $\mu\text{m}$ , Merck) in the appropriate solvent system.

**Fig. S1a.**  $^1\text{H}$  NMR, 3,28-diacetoxy-30-diethoxyphosphoryloxybetulin **4**

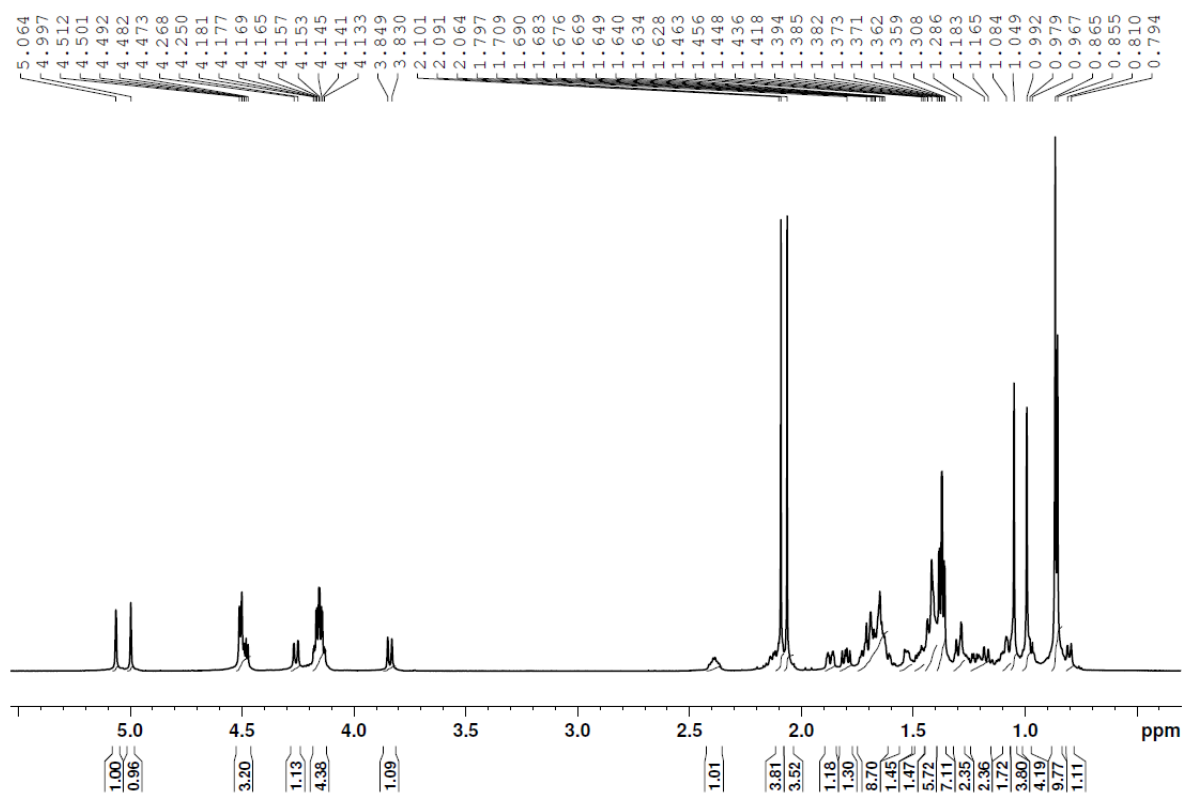

**Fig. S1b.**  $^{13}\text{C}$  NMR, 3,28-diacetoxy-30-diethoxyphosphoryloxybetulin **4**

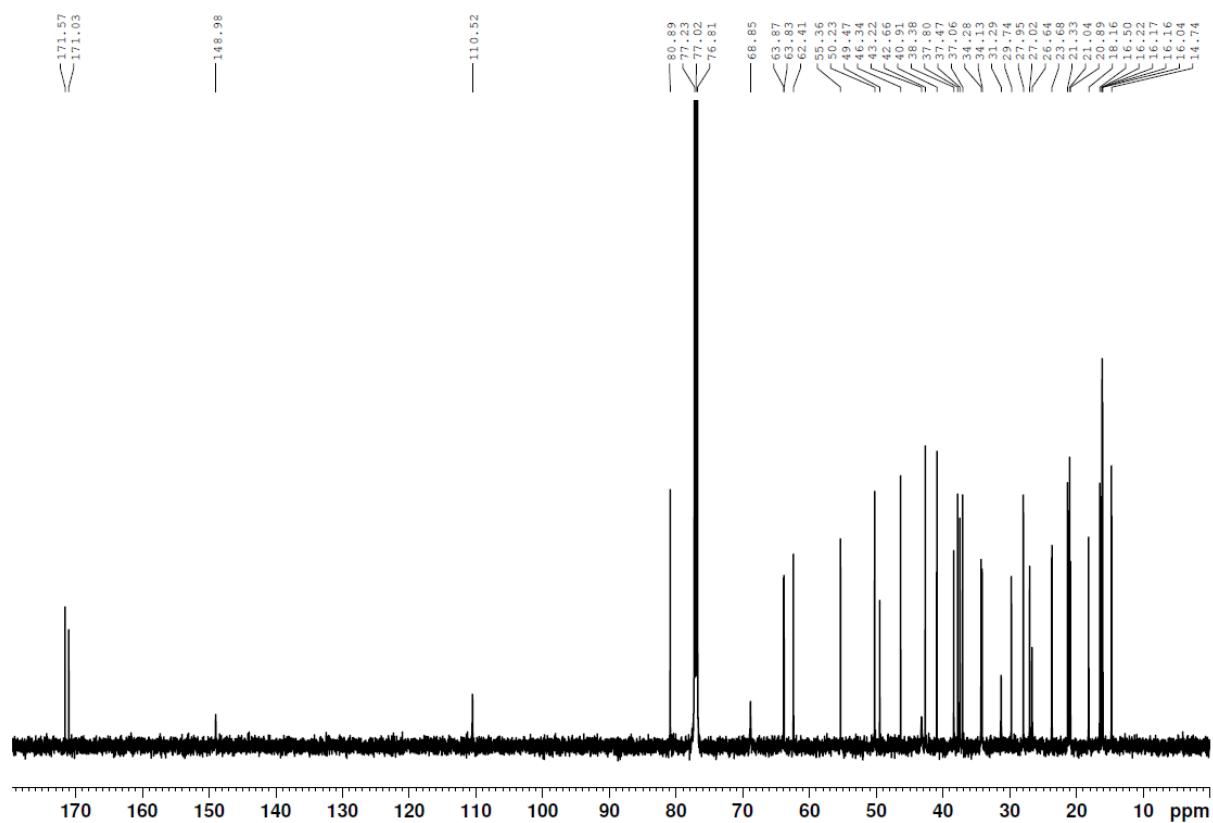

**Fig. S1c.**  $^{31}\text{P}$  NMR, 3,28-diacetoxy-30-diethoxyphosphoryloxybetulin **4**

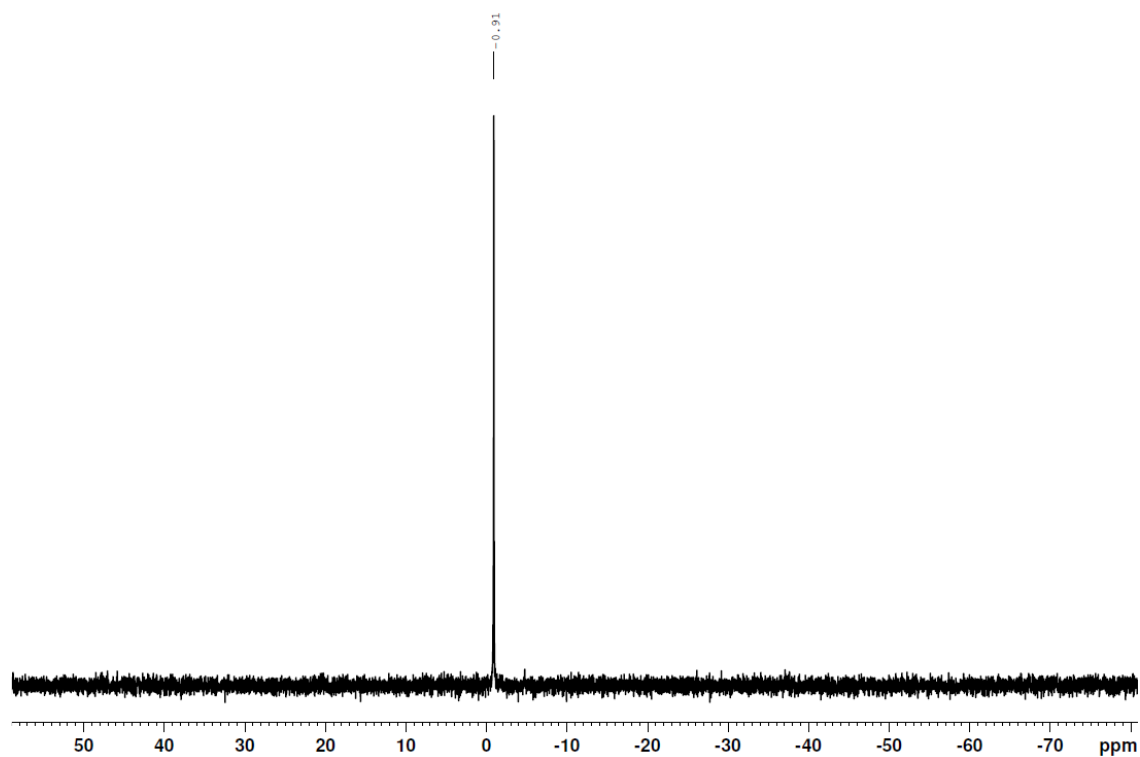

**Fig. S1d.** HR-MS, 3,28-diacetoxy-30-diethoxyphosphoryloxybetulin **4**

## Mass Spectrum List Report

### Analysis Info

Analysis Name D:\Data\PM\_20171204\ECh 91.d  
 Method low\_mass.m  
 Sample Name AN 40\_18  
 Comment

Acquisition Date 5/29/2018 11:56:50 AM

Operator KM  
 Instrument impact II 1825265.10082

### Acquisition Parameter

|             |          |                      |          |                  |           |
|-------------|----------|----------------------|----------|------------------|-----------|
| Source Type | APCI     | Ion Polarity         | Negative | Set Nebulizer    | 2.0 Bar   |
| Focus       | Active   | Set Capillary        | 4000 V   | Set Dry Heater   | 200 °C    |
| Scan Begin  | 100 m/z  | Set End Plate Offset | -500 V   | Set Dry Gas      | 5.0 l/min |
| Scan End    | 2000 m/z | Set Charging Voltage | 2000 V   | Set Divert Valve | Source    |
|             |          | Set Corona           | 2000 nA  | Set APCI Heater  | 450 °C    |

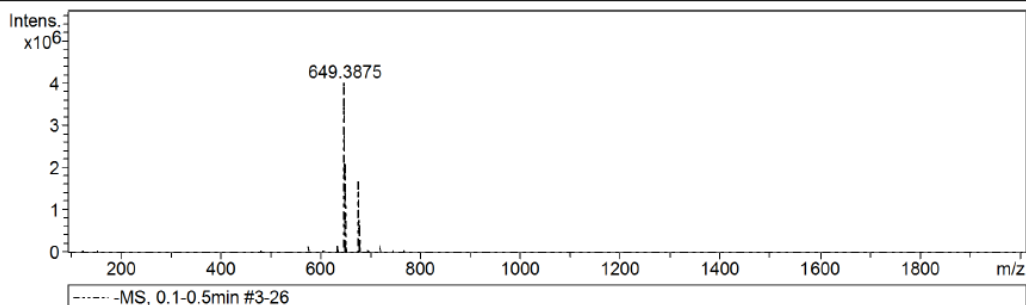

| # | m/z      | Res.  | S/N     | I       | I%    | FWHM   |
|---|----------|-------|---------|---------|-------|--------|
| 1 | 649.3875 | 34211 | 93549.7 | 4005252 | 100.0 | 0.0190 |
| 2 | 677.4180 | 47699 | 39267.9 | 1700025 | 42.4  | 0.0142 |

**Fig. S2a.** <sup>1</sup>H NMR, 30-diethoxyphosphoryloxybetulin **5**

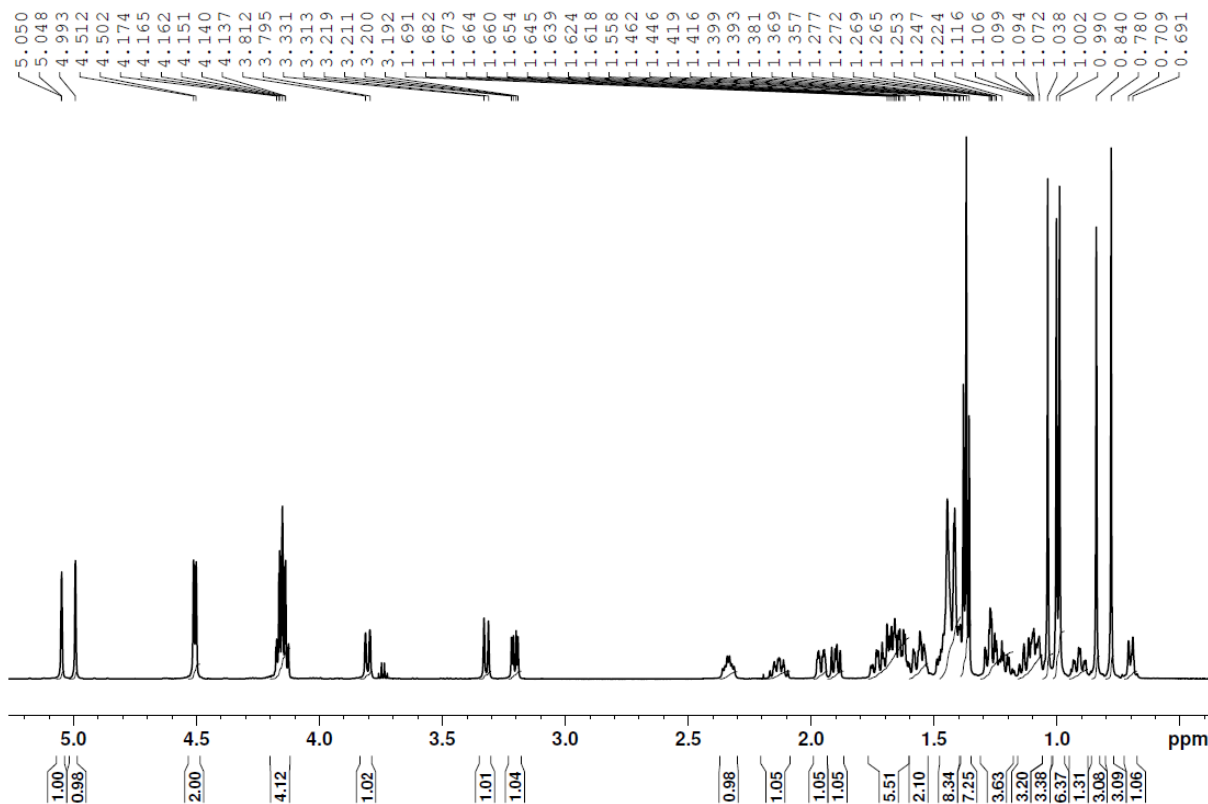

**Fig. S2b.** <sup>13</sup>C NMR, 30-diethoxyphosphoryloxybetulin **5**

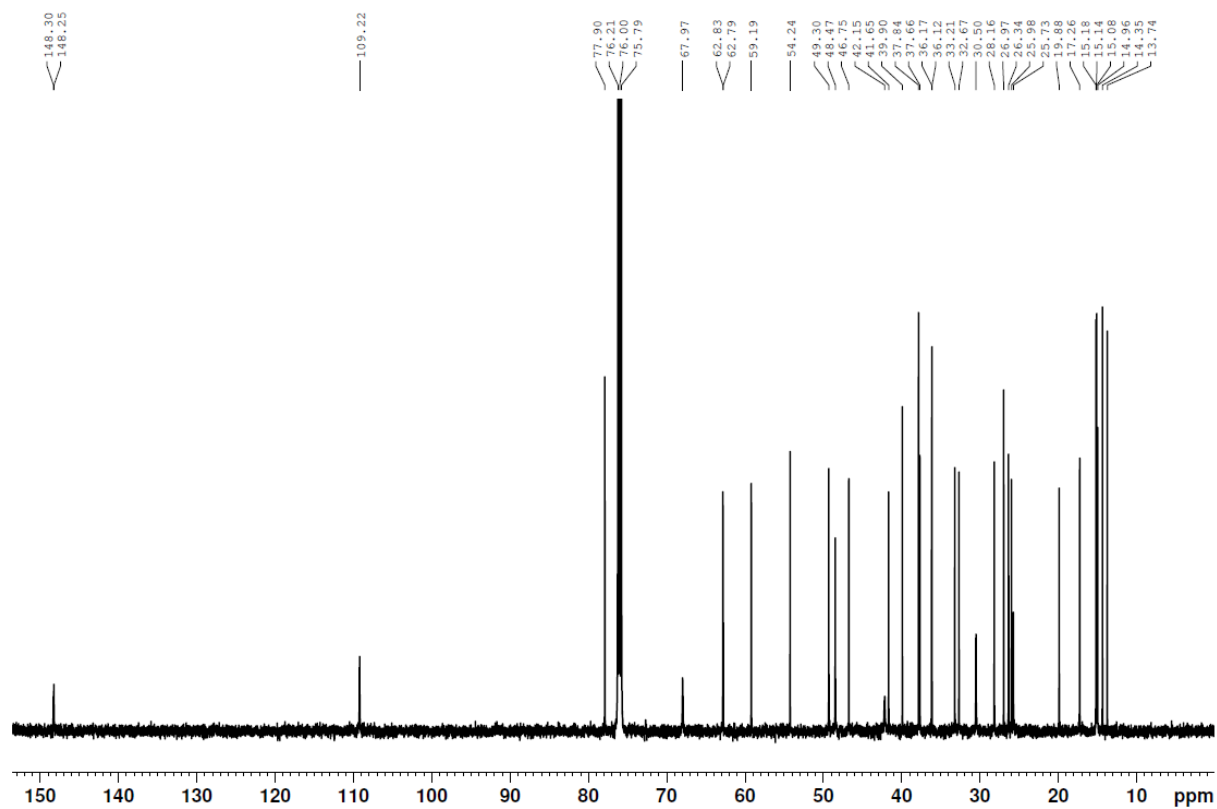

**Fig. S2c.**  $^{31}\text{P}$  NMR, 30-diethoxyphosphoryloxybetulin 5

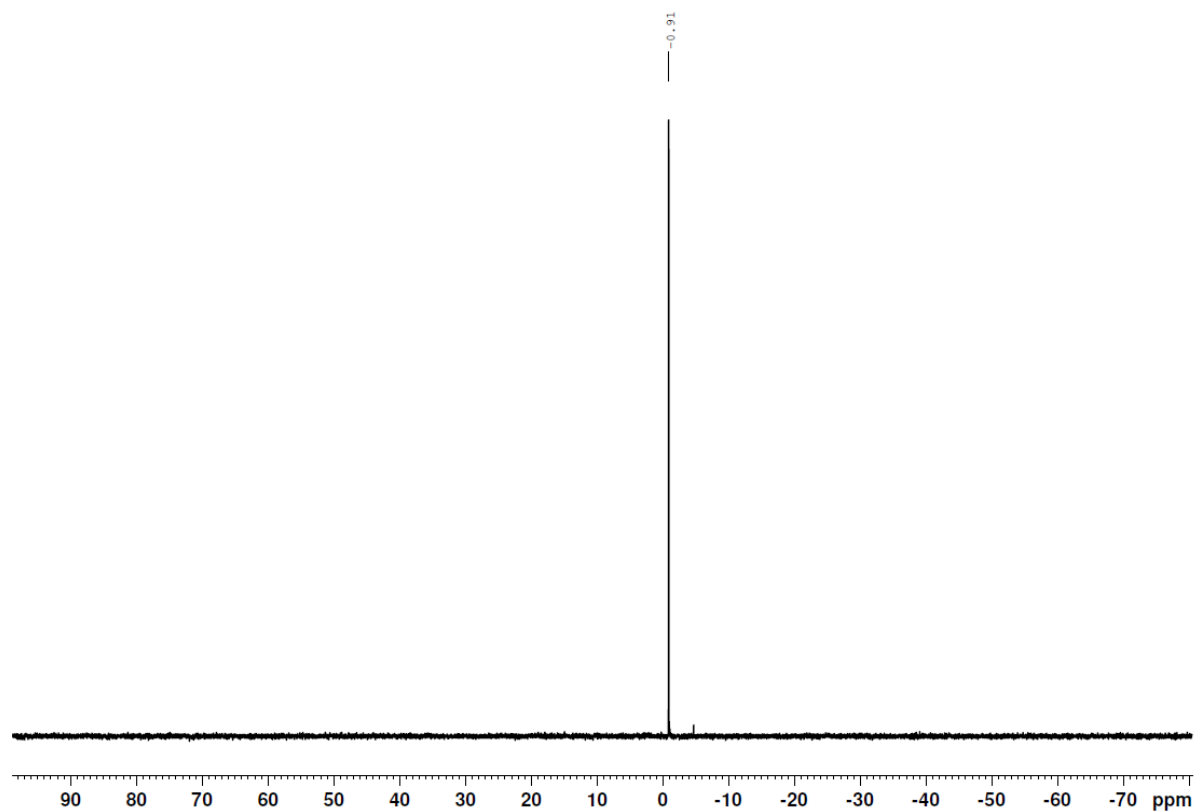

**Fig. S2d.** HR-MS, 30-diethoxyphosphoryloxybetulin 5

## Mass Spectrum List Report

### Analysis Info

Analysis Name D:\Data\PM\_20171204\ECh 156.d  
 Method low\_mass.m  
 Sample Name AN 40\_18  
 Comment

Acquisition Date 5/29/2018 12:00:10 PM

Operator KM  
 Instrument impact II 1825265.10082

### Acquisition Parameter

|             |          |                      |          |                  |           |
|-------------|----------|----------------------|----------|------------------|-----------|
| Source Type | APCI     | Ion Polarity         | Negative | Set Nebulizer    | 2.0 Bar   |
| Focus       | Active   | Set Capillary        | 4000 V   | Set Dry Heater   | 200 °C    |
| Scan Begin  | 100 m/z  | Set End Plate Offset | -500 V   | Set Dry Gas      | 5.0 l/min |
| Scan End    | 2000 m/z | Set Charging Voltage | 2000 V   | Set Divert Valve | Source    |
|             |          | Set Corona           | 2000 nA  | Set APCI Heater  | 450 °C    |

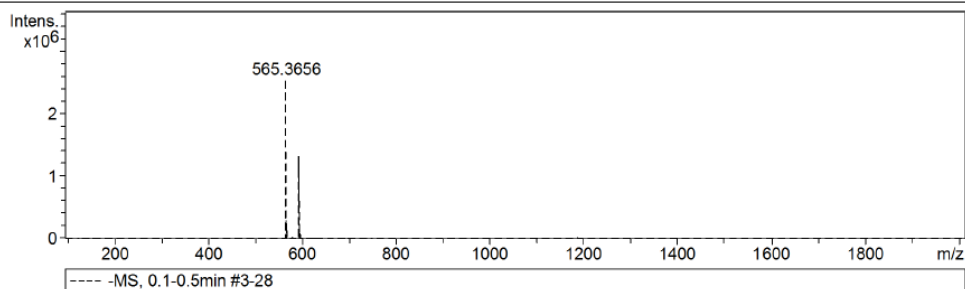

| # | m/z      | Res.  | S/N      | I       | I%    | FWHM   |
|---|----------|-------|----------|---------|-------|--------|
| 1 | 565.3656 | 32462 | 104071.4 | 2548734 | 100.0 | 0.0174 |
| 2 | 593.3959 | 43911 | 48052.0  | 1265967 | 49.7  | 0.0135 |

**Fig. S3a.** <sup>1</sup>H NMR, 30-diethoxyphosphoryloxy-28-propynoylbetulin **7a**

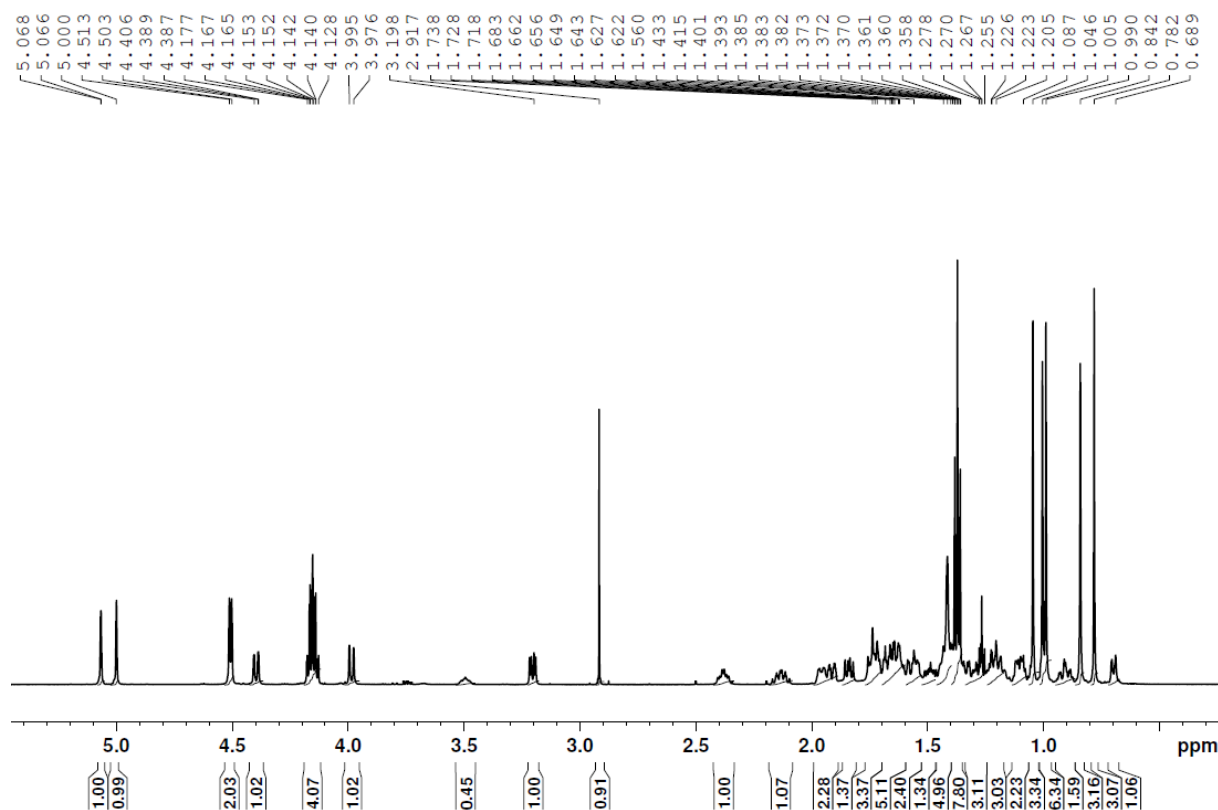



**Fig. S3b.**  $^{13}\text{C}$  NMR, 30-diethoxyphosphoryloxy-28-propynoylbetulin **7a**

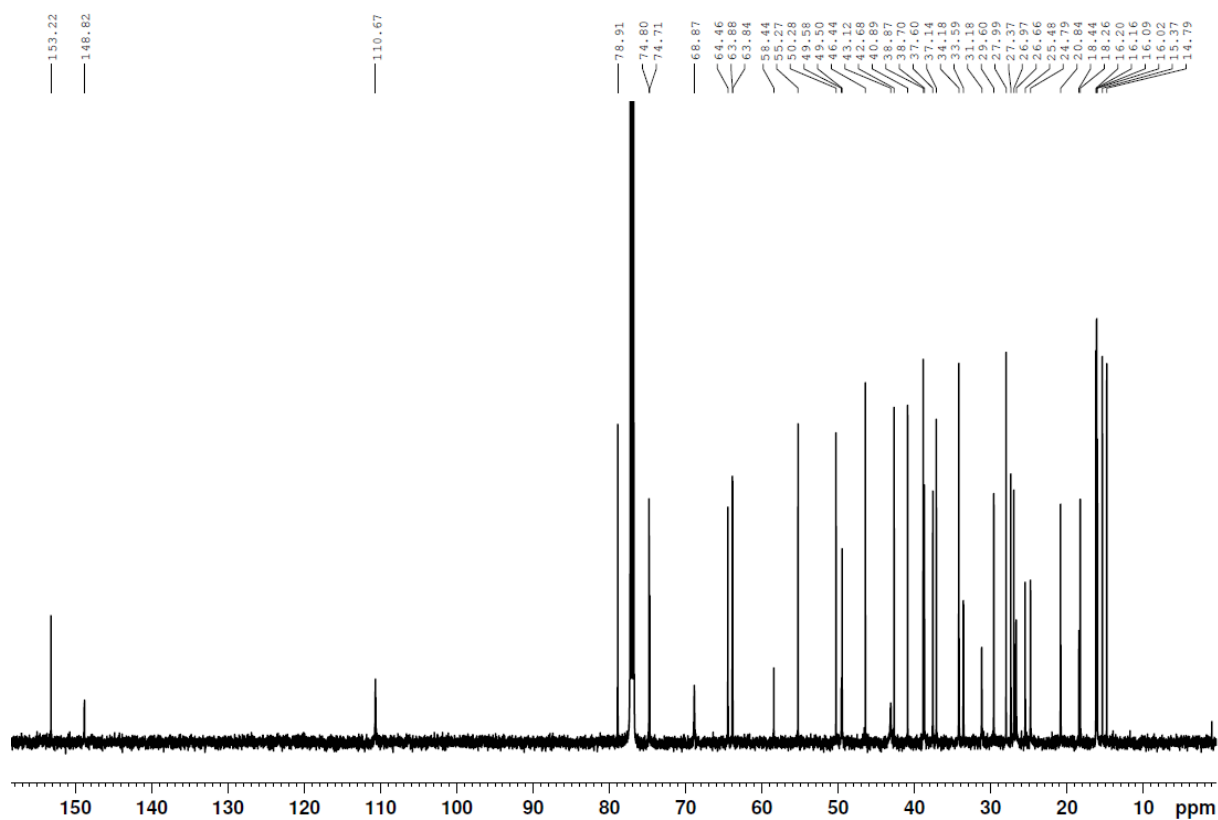

**Fig. S3c.**  $^{31}\text{P}$  NMR, 30-diethoxyphosphoryloxy-28-propynoylbetulin **7a**

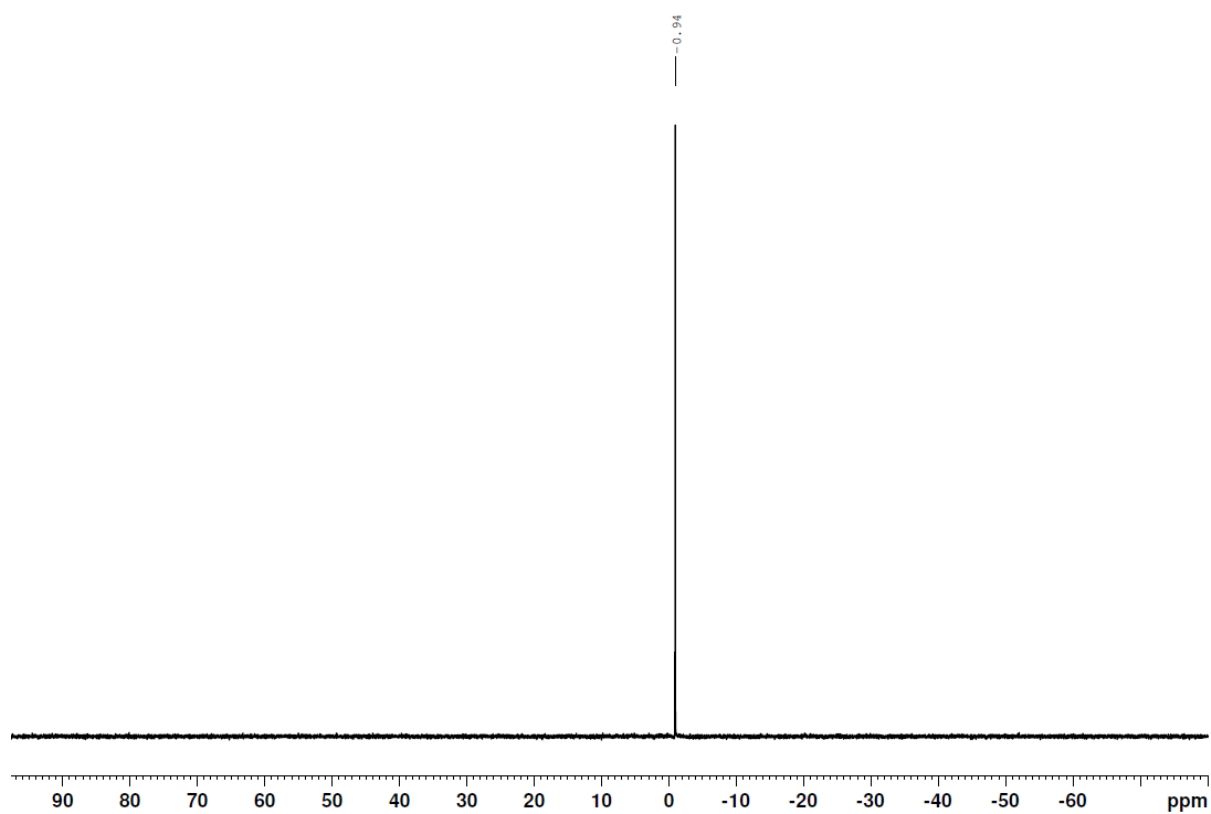

**Fig. S3d.** HR-MS, 30-diethoxyphosphoryloxy-28-propynoylbetulin **7a**

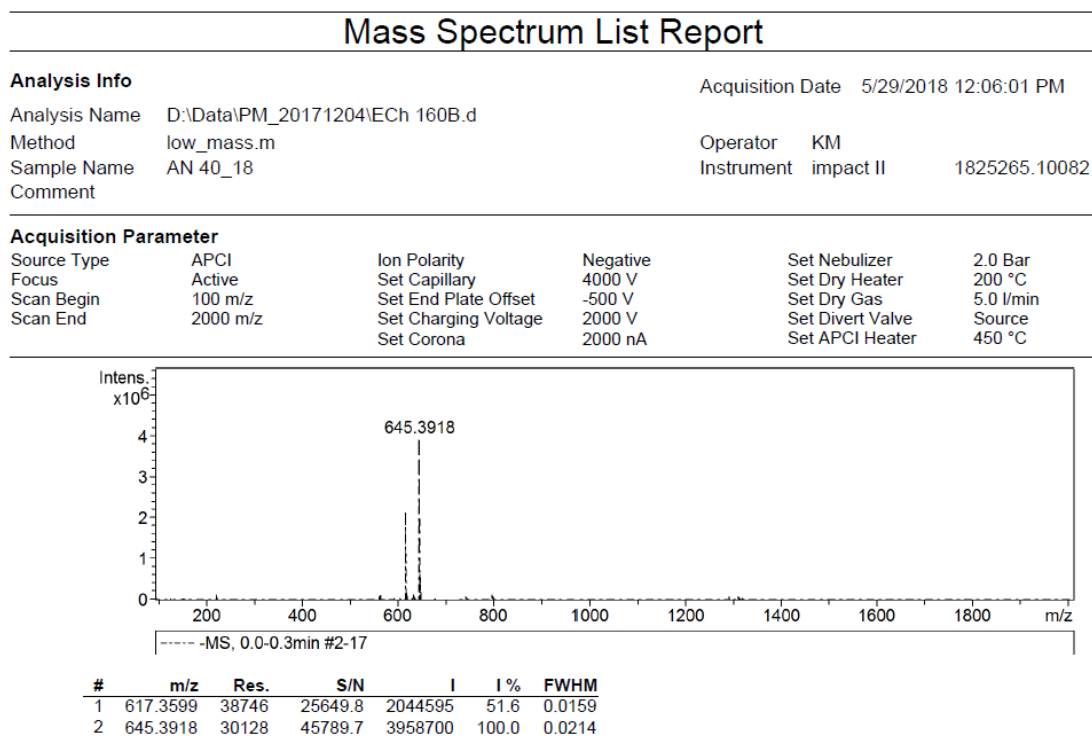

**Fig. S4a.** <sup>1</sup>H NMR, 28-(2-butynoyl)-30-diethoxyphosphoryloxybetulin **7b**

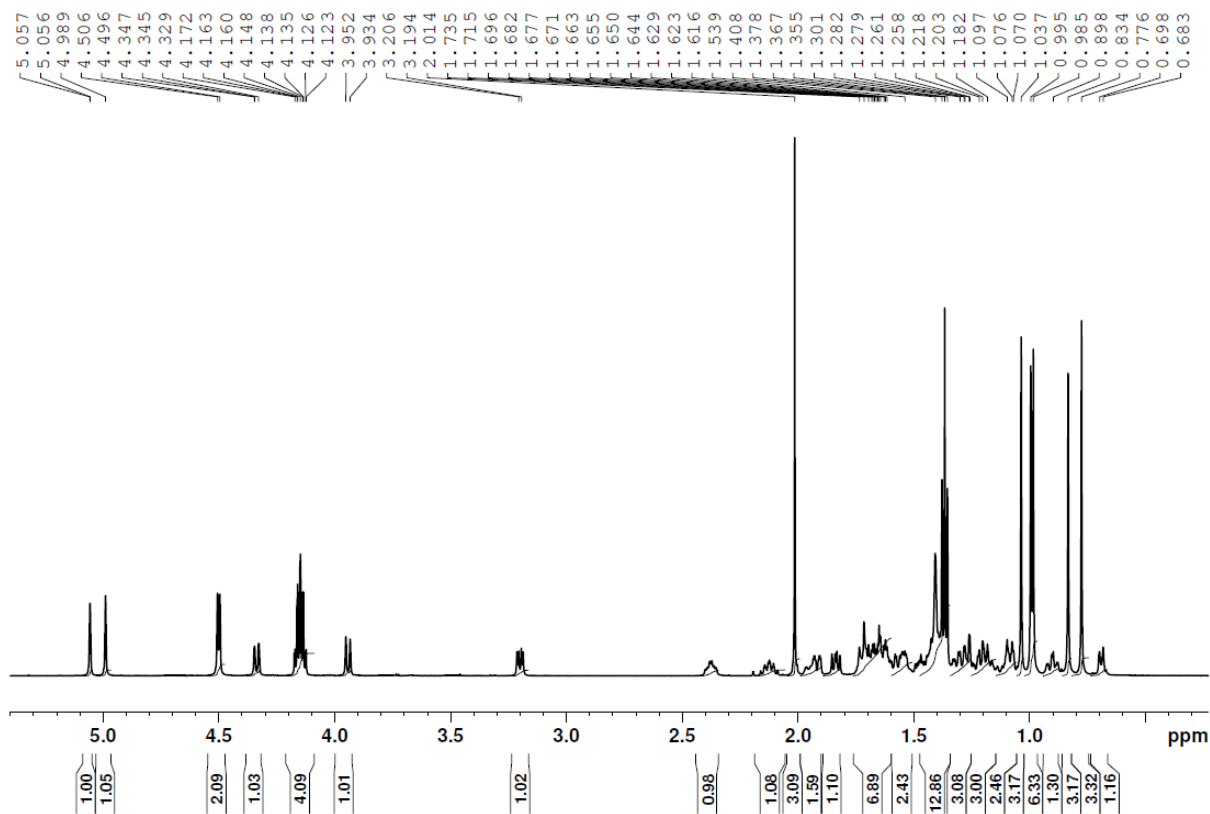

**Fig. S4b.** <sup>13</sup>C NMR, 28-(2-butynoyl)-30-diethoxyphosphoryloxybetulin **7b**

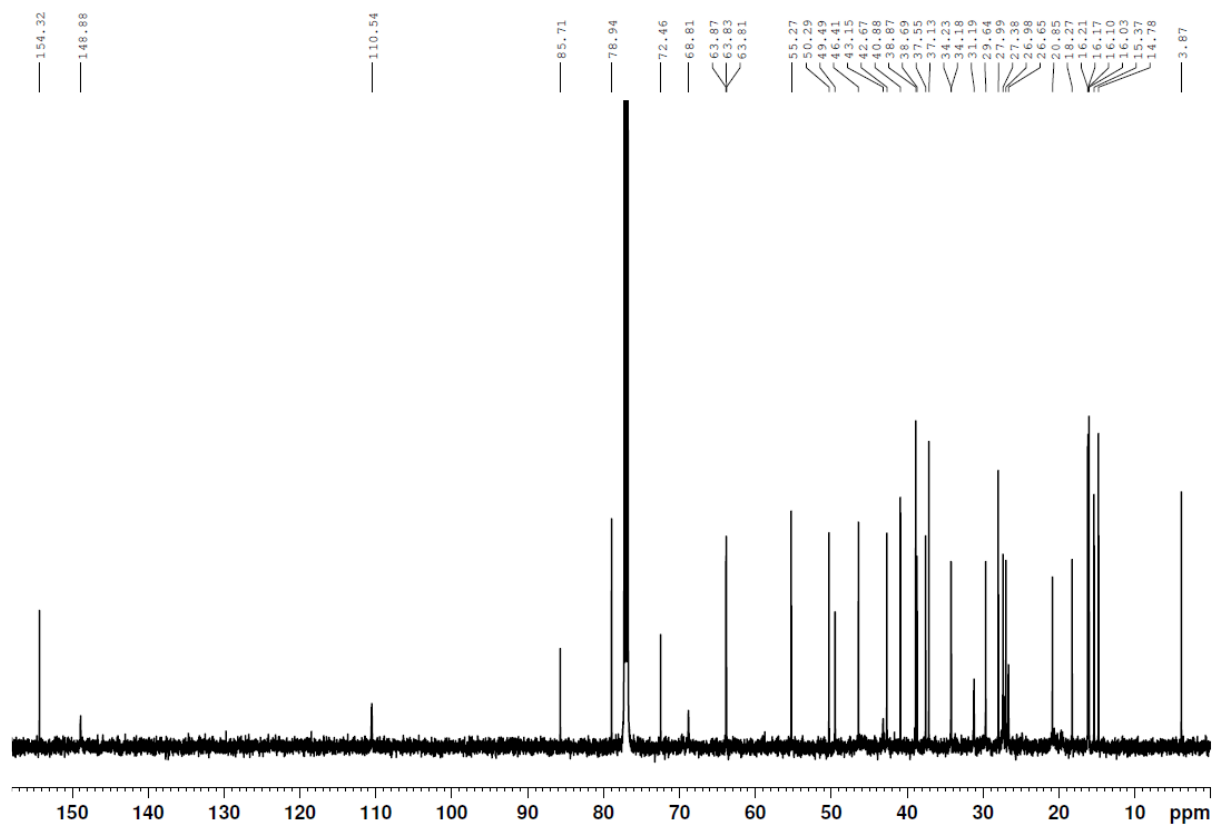

**Fig. S4c.**  $^{31}\text{P}$  NMR, 28-(2-butynoyl)-30-diethoxyphosphoryloxybetulin **7b**

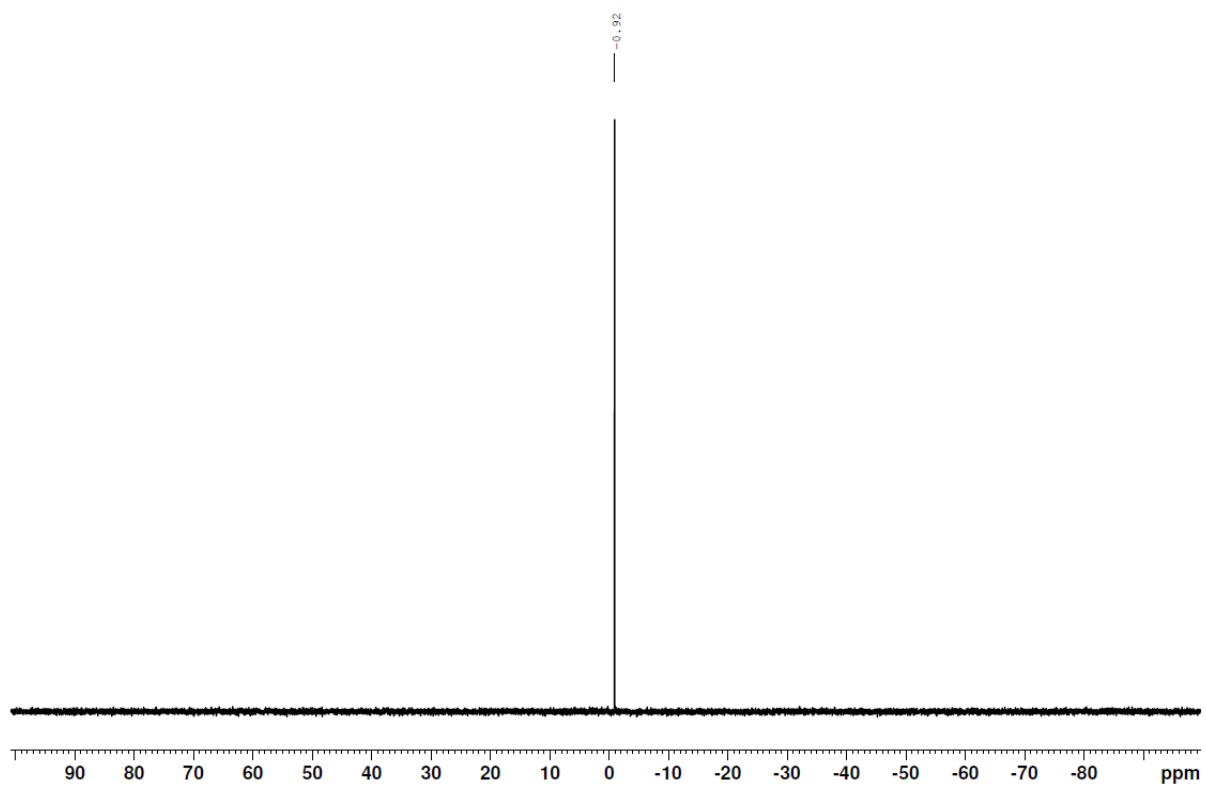

**Fig. S4d.** HR-MS, 28-(2-butynoyl)-30-diethoxyphosphoryloxybetulin **7b**

## Mass Spectrum List Report

### Analysis Info

Analysis Name D:\Data\PM\_20171204\ECh 197B.d  
 Method low\_mass.m  
 Sample Name AN 40\_18  
 Comment

Acquisition Date 5/29/2018 12:25:52 PM

Operator KM  
 Instrument impact II 1825265.10082

### Acquisition Parameter

|             |          |                      |          |                  |           |
|-------------|----------|----------------------|----------|------------------|-----------|
| Source Type | APCI     | Ion Polarity         | Negative | Set Nebulizer    | 2.0 Bar   |
| Focus       | Active   | Set Capillary        | 4000 V   | Set Dry Heater   | 200 °C    |
| Scan Begin  | 100 m/z  | Set End Plate Offset | -500 V   | Set Dry Gas      | 5.0 l/min |
| Scan End    | 2000 m/z | Set Charging Voltage | 2000 V   | Set Divert Valve | Source    |
|             |          | Set Corona           | 2000 nA  | Set APCI Heater  | 450 °C    |

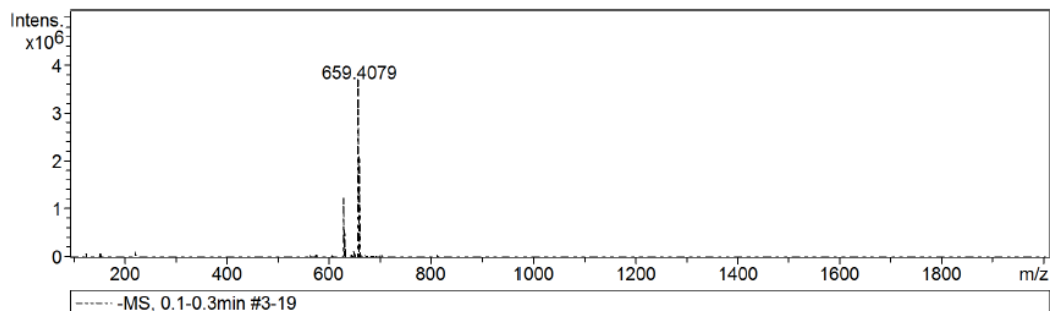

| # | m/z      | Res.  | S/N     | I       | I%    | FWHM   |
|---|----------|-------|---------|---------|-------|--------|
| 1 | 631.3761 | 42825 | 23532.0 | 1261227 | 35.0  | 0.0147 |
| 2 | 659.4079 | 32459 | 63725.6 | 3608503 | 100.0 | 0.0203 |

**Fig. S5a.** <sup>1</sup>H NMR, 28-(2-cyclopropylpropynoyl)-30-diethoxyphosphoryloxybetulin **7c**

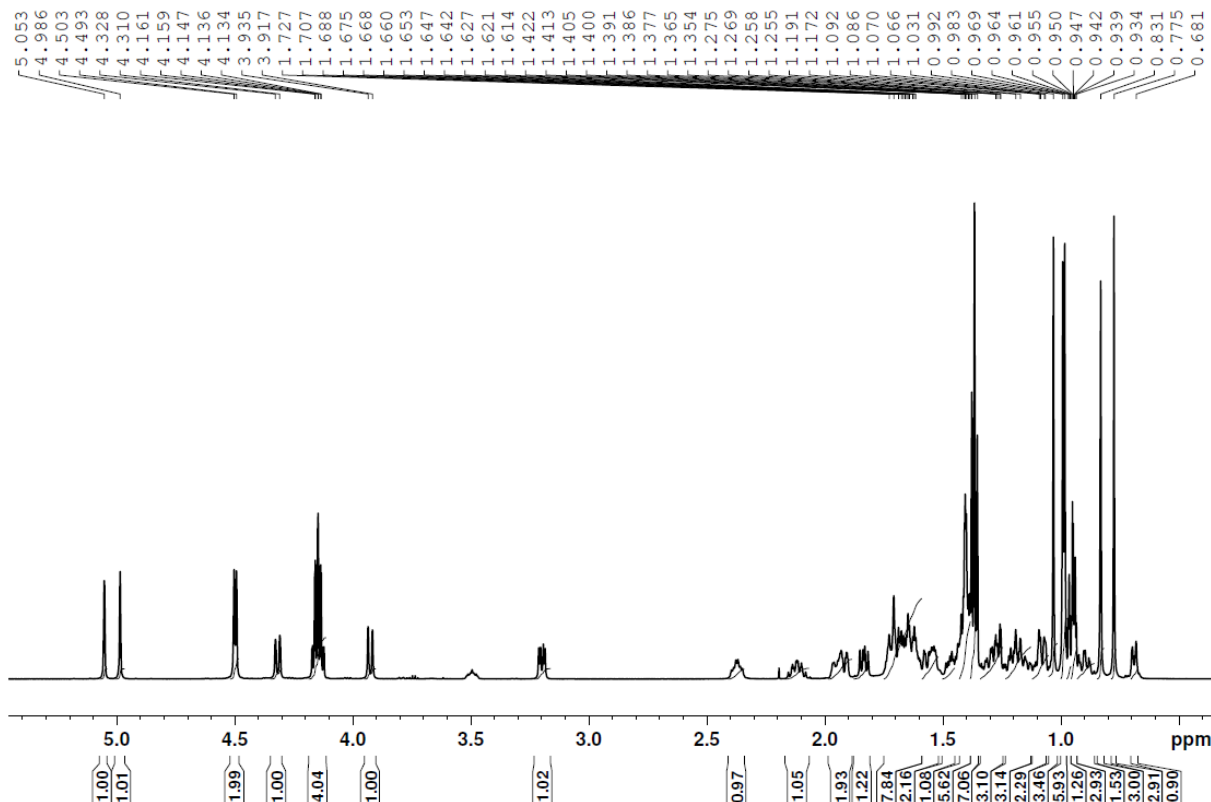

**Fig. S5b.** <sup>13</sup>C NMR, 28-(2-cyclopropylpropynoyl)-30-diethoxyphosphoryloxybetulin **7c**

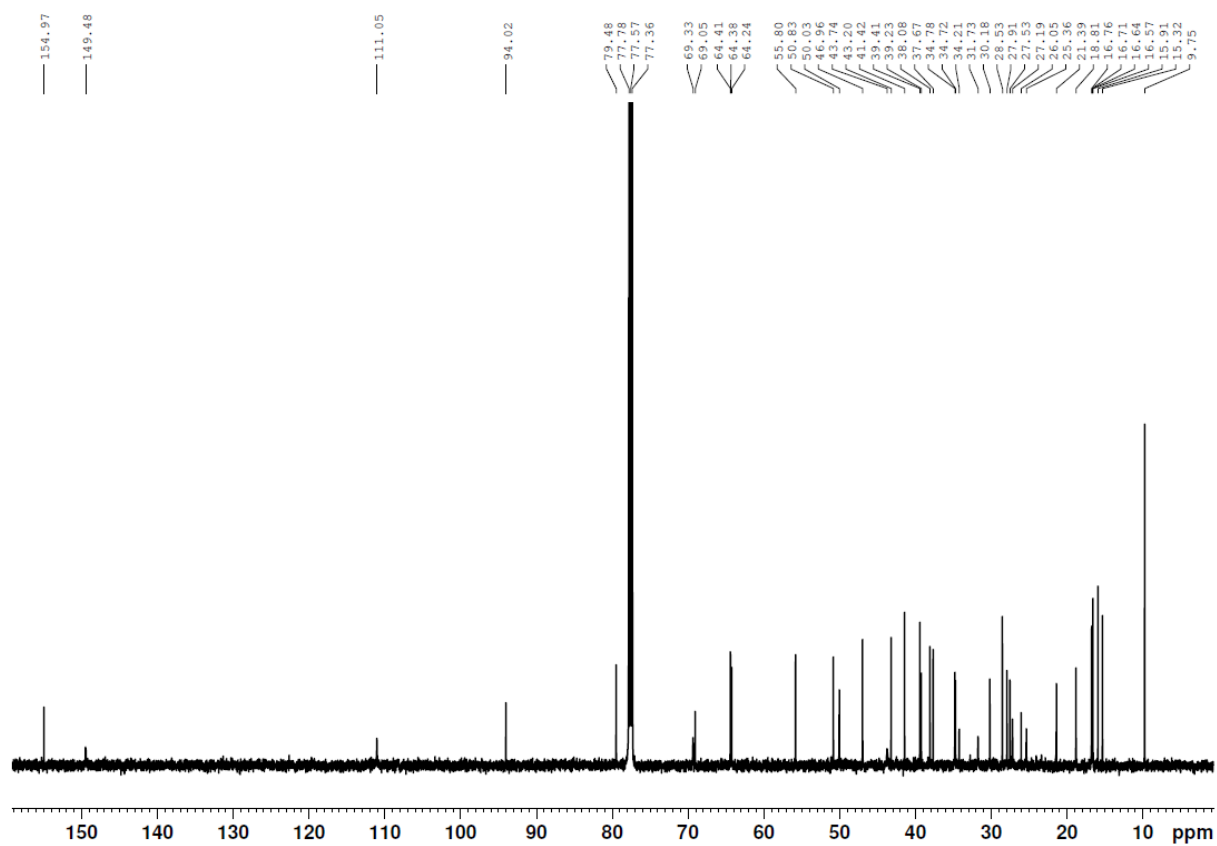

**Fig. S5c.**  $^{31}\text{P}$  NMR, 28-(2-cyclopropylpropynoyl)-30-diethoxyphosphoryloxybetulin **7c**

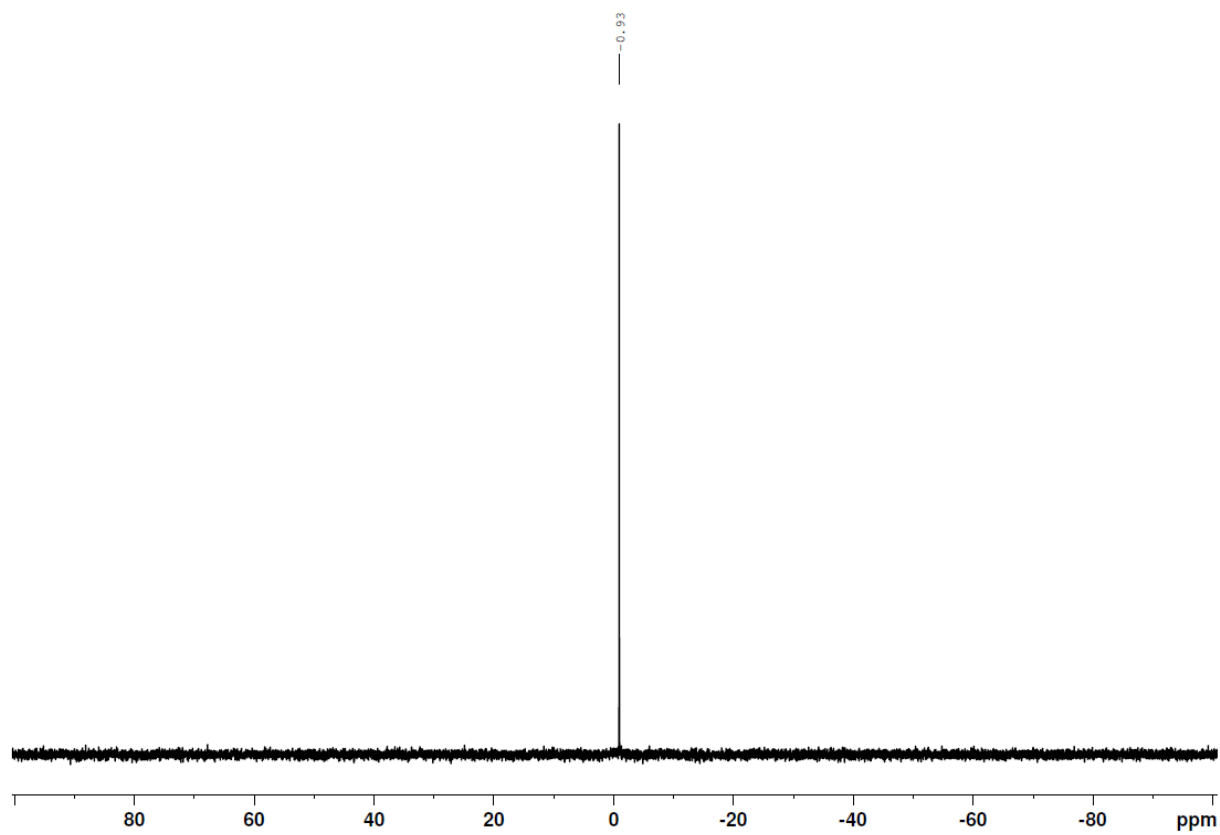

**Fig. S5d.** HR-MS, 28-(2-cyclopropylpropynoyl)-30-diethoxyphosphoryloxybetulin **7c**

## Mass Spectrum List Report

### Analysis Info

Analysis Name D:\Data\PM\_20171204\ECh 184B.d  
 Method low\_mass.m  
 Sample Name AN 40\_18  
 Comment

Acquisition Date 5/29/2018 12:17:29 PM

Operator KM  
 Instrument impact II 1825265.10082

### Acquisition Parameter

|             |          |                      |          |                  |           |
|-------------|----------|----------------------|----------|------------------|-----------|
| Source Type | APCI     | Ion Polarity         | Negative | Set Nebulizer    | 2.0 Bar   |
| Focus       | Active   | Set Capillary        | 4000 V   | Set Dry Heater   | 200 °C    |
| Scan Begin  | 100 m/z  | Set End Plate Offset | -500 V   | Set Dry Gas      | 5.0 l/min |
| Scan End    | 2000 m/z | Set Charging Voltage | 2000 V   | Set Divert Valve | Source    |
|             |          | Set Corona           | 2000 nA  | Set APCI Heater  | 450 °C    |

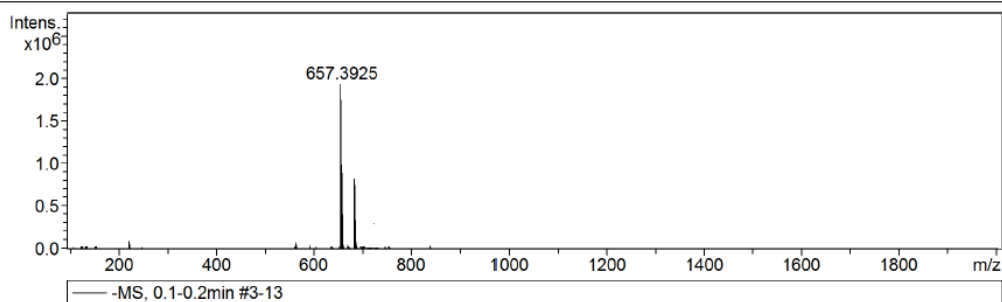

| # | m/z      | Res.  | S/N     | I       | I%    | FWHM   |
|---|----------|-------|---------|---------|-------|--------|
| 1 | 657.3925 | 35852 | 37519.9 | 1938661 | 100.0 | 0.0183 |
| 2 | 685.4229 | 46227 | 15393.9 | 830665  | 42.8  | 0.0148 |

**Table S1.** Calculated Raman band frequencies and assignments for compounds **10** and **5**.

| Calculated spectra |            |                                                                                             |
|--------------------|------------|---------------------------------------------------------------------------------------------|
| <b>5</b>           | <b>10</b>  |                                                                                             |
| 3621, 3611         | 3640, 3625 | OH stretching                                                                               |
| 3152, 3075         | 3077       | =C-H stretching in side chain                                                               |
| 3053-3042          | 3065       | -C-H stretching in cycloalkane ring                                                         |
| 3041-2834          | 3048-2844  | CH <sub>3</sub> , CH <sub>2</sub> , CH stretching in side chain and cycloalkane ring        |
| 1677               | 1609       | C=C stretching in allyl/vinyl chains                                                        |
| 1470-1405          |            | CH <sub>3</sub> , CH <sub>2</sub> , CH bending in side chain and cycloalkane ring           |
| 1386-1353          |            | CH <sub>3</sub> , CH <sub>2</sub> , CH, OH bending in side chain, P=O bending in side chain |
| 1248               | -          | P-O stretching in O=P-O-C moiety                                                            |
| -                  | 1208       | P-C stretching in O=P-C=C moiety                                                            |
| -                  | 1180       | P=O bending in O=P-C=C moiety                                                               |
| 1153               | -          | P=O bending in O=P-O-C moiety                                                               |
| 1100-1050          |            | CH <sub>3</sub> , CH <sub>2</sub> , CH, OH bending in cycloalkane ring and side chain       |
| 1026               | -          | P-O bending, C-C stretching in side chain and in cycloalkane ring                           |

|                    |               |                                                                                                   |
|--------------------|---------------|---------------------------------------------------------------------------------------------------|
| -                  | 809           | P-C, CH <sub>3</sub> , CH <sub>2</sub> bending, C-C stretching                                    |
| 776, 702           | 750, 765, 688 | CH <sub>3</sub> , CH <sub>2</sub> , CH bending in side chain and cycloalkane ring, C-C stretching |
| 660-540            | 660-560       | C-C in cycloalkane ring                                                                           |
| 527, 470, 447, 360 | 567, 509      | C-C stretching, CH <sub>3</sub> , CH <sub>2</sub> in side chain                                   |
| 401                | -             | P-O bending in O=P-O-C                                                                            |
| 277                | 234           | O-H bending                                                                                       |

### *X-ray diffraction experiment*

Colorless single crystals of good quality were preselected under a polarized light microscope. X-ray experiment was performed at 100K. The data for compound **5** were collected using an SuperNova diffractometer (Agilent Technologies) with Atlas detector. Accurate cell parameters were determined and refined using CrysAlis CCD program [57]. For the integration of the collected data, the CrysAlis RED program [58] was used.

### *Refinement*

The crystal structure was determined using the using direct method with SHELXS-2014 [59] program and then the solutions were refined using SHELXL-2014 [59] program. H atoms were treated as riding atoms in geometrically idealized positions, fixing the C-H bond lengths at 0.95, 1.00, 0.99, 0.95 and 0.98 Å for aldehyde CH, methine CH, methylene CH<sub>2</sub>, terminal methylene CH<sub>2</sub> and methyl CH<sub>3</sub> atoms respectively, and with Uiso(H) ¼ 1.5Ueq(C) for methyl H atoms or 1.2Ueq(C) otherwise. Hydrogen atoms involved in H-bonding (acetylenic and hydroxyl H atoms) were introduced into the calculated positions and then refined freely with isotropic atomic displacement parameters.

Crystal structure was deposited at the Cambridge Crystallographic Data Center, with deposit number CCDC 2039827 and is available free of charge via [www.ccdc.cam.ac.uk/data\\_request/cif](http://www.ccdc.cam.ac.uk/data_request/cif).

### References

59. Sheldrick, G. A short history of SHELX, *Acta Cryst. A* 64, **2008**, 112–122, <https://doi.org/10.1107/S0108767307043930>.
60. CrysAlis PRO. Agilent Technologies Ltd, Yarnton, Oxfordshire, England. 2014.
61. Sheldrick, G.M. Crystal structure refinement with SHELXL, *Acta Cryst C* 71 **2015**, 3e8.

**Table S2** Crystal parameters, data collection and refinement details for compound **5**

|                                                                            |                                                                                                                                                                                         |
|----------------------------------------------------------------------------|-----------------------------------------------------------------------------------------------------------------------------------------------------------------------------------------|
| Data collection                                                            |                                                                                                                                                                                         |
| Diffractometer                                                             | SuperNova diffractometer (Agilent Technologies) with Atlas detector                                                                                                                     |
| Absorption correction                                                      | Multi-scan<br>CrysAlis PRO 1.171.38.41q (Rigaku Oxford Diffraction, 2015)<br>Empirical absorption correction using spherical harmonics, implemented in SCALE3 ABSPACK scaling algorithm |
| $T_{\min}, T_{\max}$                                                       | 0.592, 1.000                                                                                                                                                                            |
| No. of measured, independent and observed [ $I > 2\sigma(I)$ ] reflections | 573037, 23993, 7243                                                                                                                                                                     |
| $R_{\text{int}}$                                                           | 0.0462                                                                                                                                                                                  |
| $(\sin \theta/\lambda)_{\text{max}}$ ( $\text{\AA}^{-1}$ )                 | 0.711                                                                                                                                                                                   |
| Refinement                                                                 |                                                                                                                                                                                         |
| $R[F^2 > 2\sigma(F^2)]$ , $wR(F^2)$ , $S$                                  | 0.0496, 0.1260, 1.019                                                                                                                                                                   |
| No. of reflections                                                         | 6602                                                                                                                                                                                    |
| No. of parameters                                                          | 379                                                                                                                                                                                     |
| H-atom treatment                                                           | H-atom parameters constrained                                                                                                                                                           |
| $\Delta\rho_{\text{max}}, \Delta\rho_{\text{min}}$ ( $\text{e \AA}^{-3}$ ) | 0.66, -0.29                                                                                                                                                                             |



|                    |                                                                                                                              |
|--------------------|------------------------------------------------------------------------------------------------------------------------------|
| Absolute structure | Flack x determined using 4515 quotients [(I+)-(I-)]/[(I+)+(I-)] (Parsons, Flack and Wagner, Acta Cryst. B69 (2013) 249-259). |
|--------------------|------------------------------------------------------------------------------------------------------------------------------|

**Table S3** Monocrystal characteristic for compound **5**.

|                                    |                                                  |
|------------------------------------|--------------------------------------------------|
| Compound                           | <b>5</b>                                         |
| Chemical formula                   | C <sub>34</sub> H <sub>59</sub> O <sub>6</sub> P |
| <i>M<sub>r</sub></i>               | 594.78                                           |
| Solvent                            | CH <sub>3</sub> CN                               |
| Crystal system, space group        | Monoclinic, P 21                                 |
| Temperature (K)                    | 100                                              |
| <i>a</i> , <i>b</i> , <i>c</i> (Å) | 7.3147(3); 11.8986(5); 18.6947(8)                |
| <i>α</i> , <i>β</i> , <i>γ</i> [°] | 90; 97.977(4); 90                                |
| <i>V</i> (Å <sup>3</sup> )         | 1611.34(12)                                      |
| <i>Z</i>                           | 2                                                |
| Radiation type                     | Cu <i>Kα</i>                                     |
| <i>μ</i> (mm <sup>-1</sup> )       | 0.128                                            |

**Table S4.** Selected hydrogen bonds in the crystal structure of compound **5**

D: donor, A: acceptor. Distances DH, HA, DA are in Å and DHA angles are in degrees.

| Nr | D-H...A       | D-H [Å] | H...A [Å] | D...A [Å] | <(DHA) | Symmetry codes  |
|----|---------------|---------|-----------|-----------|--------|-----------------|
| 1  | O1-H1...O2    | 0.84(5) | 1.95(5)   | 2.786(4)  | 170(5) | -x+1,y-1/2,-z   |
| 2  | O2-H2...O4    | 0.90(5) | 1.86(5)   | 2.754(4)  | 170(5) | -x+2,y+1/2,-z+1 |
| 3  | C30-H30B...O4 | 1.00(4) | 2.44(5)   | 2.948(5)  | 111(3) | ---             |
| 4  | C31-H31B...O1 | 1.01(5) | 2.48(5)   | 3.008(5)  | 112(3) | -x+2,y-1/2,-z   |
| 5  | C32-H32A...O4 | 1.01(6) | 2.62(6)   | 3.486(6)  | 144(4) | -x+2,y-1/2,-z+1 |

#### **Chromatographic procedure by RP-TLC**

The experimental lipophilicity parameters was determined using reversed-phase thin-layer chromatography (RP-TLC). The stationary phase was an aluminium backed silica gel RP-18 F<sub>254</sub> S plates (Merck, Darmstadt, Germany). Chloroform solutions of reference compounds

(acetanilide, 4-bromoacetophenone, benzophenone, anthracene, DDT) and triterpenes **3-5**, **6a-6e** and **7a-7e** were spotted on to the plates in the amount of 2  $\mu$ L. The chromatograms were performed in triplicate for each compound. The chromatographic chambers were filled of mobile phases consisting of a mixture of acetone (POCh, Gliwice, Poland) and aqueous solution of buffer Tris [(tris-hydroxymethyl)aminomethane] (Fluka, Loughborough, 0.2 M, pH 7.4). The percent acetone volume was varied within the range of 90-60%, in 5% increments. The spots of compounds were visualized by spraying the plates with 10% ethanolic solution of sulphuric acid (VI) and heating for 3 min at 110  $^{\circ}$ C [60]]. The  $R_M$  values were calculated by the equation  $R_M = \log (1/R_f - 1)$  on the basis of average  $R_f$  values. The  $R_{M0}$  parameters were obtained by extrapolating on the acetone content to zero, according to the equation  $R_M = R_{M0} + bC$  ( $C$  – the percentage concentration of acetone in the mobile phase,  $b$  – the slope of the regression plot). The experimental lipophilicity as  $\log P_{TLC}$  for triterpenes **3-5**, **6a-6e** and **7a-7e** was calculated by calibration equation

$$\log P_{TLC} = 1,2649R_{M0} + 0,2094 \quad (r = 0.996; SD = 0.445)$$

obtained on the correlation between the literature  $\log P_{lit}$  values and the experimental  $R_{M0}$  values for standard compounds.

**Table S5.** The theoretical values of lipophilicity for tested compounds **3-5**, **6a-6e** and **7a-7e**.

| Compound  | ALOGPs | AC logP | miLogP | ALOGP | MLOGP | XLOGP2 | XLOGP3 |
|-----------|--------|---------|--------|-------|-------|--------|--------|
| <b>3</b>  | 5.50   | 5.86    | 7.33   | 5.98  | 5.83  | 7.84   | 8.18   |
| <b>4</b>  | 7.00   | 6.24    | 7.97   | 6.68  | 6.61  | 8.49   | 8.89   |
| <b>5</b>  | 5.33   | 5.26    | 5.56   | 5.93  | 5.97  | 7.01   | 7.74   |
| <b>6a</b> | 6.23   | 5.15    | 7.87   | 9.23  | 6.79  | 9.04   | 9.85   |
| <b>7a</b> | 5.78   | 5.21    | 7.21   | 7.58  | 6.37  | 8.03   | 8.8    |
| <b>6b</b> | 7.32   | 7.19    | 8.91   | 9.13  | 7.13  | 10.03  | 10.87  |
| <b>7b</b> | 6.47   | 6.23    | 8.03   | 7.53  | 6.55  | 8.41   | 9.31   |
| <b>6c</b> | 6.89   | 7.73    | 9.25   | 9.8   | 7.78  | 10.86  | 11.97  |
| <b>7c</b> | 6.23   | 6.49    | 8.42   | 7.86  | 6.89  | 8.83   | 9.85   |
| <b>6d</b> | 7.80   | 10.10   | 9.44   | 11.19 | 8.28  | 13.24  | 13.40  |
| <b>7d</b> | 6.95   | 7.68    | 8.63   | 8.56  | 7.15  | 10.13  | 10.57  |
| <b>6e</b> | 6.64   | 6.54    | 7.81   | 10.35 | 6.47  | 9.37   | 9.93   |
| <b>7e</b> | 6.17   | 5.90    | 7.19   | 8.14  | 6.21  | 8.19   | 8.84   |

**Table S6.** The correlation matrix for theoretically obtained lipophilicity parameters of compounds **3-5**, **6a-6e** and **7a-7e**.

|         | ALOGPs | AC logP | miLogP | ALOGP | MLOGP | XLOGP2 | XLOGP3 |
|---------|--------|---------|--------|-------|-------|--------|--------|
| ALOGPs  | 1.000  | 0.825   | 0.889  | 0.814 | 0.889 | 0.888  | 0.884  |
| AC logP |        | 1.000   | 0.812  | 0.725 | 0.877 | 0.939  | 0.907  |

|               |       |       |       |       |       |
|---------------|-------|-------|-------|-------|-------|
| <b>miLogP</b> | 1.000 | 0.784 | 0.904 | 0.889 | 0.909 |
| <b>ALOGP</b>  |       | 1.000 | 0.840 | 0.884 | 0.903 |
| <b>MLOGP</b>  |       |       | 1.000 | 0.959 | 0.925 |
| <b>XLOGP2</b> |       |       |       | 1.000 | 0.987 |
| <b>XLOGP3</b> |       |       |       |       | 1.000 |

62. Bębenek, E.; Bober-Majnuż, K.; Siudak, S.; Chrobak, E.; Kadela-Tomanek, M.; Wietrzyk, J.; Boryczka, S. Application of TLC to evaluate the lipophilicity of newly synthesized betulin derivatives. *J Chromatogr Sci* **2020**, *58*, 323-333. <https://doi.org/10.1093/chromsci/bmz117>.
